# **Evidence for “inter- and intraspecific horizontal genetic transfers” between anciently asexual bdelloid rotifers is explained by cross-contamination**

Christopher G. Wilson<sup>1\*</sup>, Reuben W. Nowell<sup>1</sup>, Timothy G. Barraclough<sup>1</sup>

<sup>1</sup> Department of Life Sciences, Imperial College London, Silwood Park Campus, Buckhurst Road, Ascot, Berkshire, SL5 7PY, UK

\* Corresponding author: [chris.wilson@imperial.ac.uk](mailto:chris.wilson@imperial.ac.uk)

## **Abstract**

Bdelloid rotifers are a diverse group of microscopic invertebrates that are believed to have evolved for tens of millions of years without sexual reproduction. They have attracted the attention of biologists puzzled by the maintenance of sex and recombination among nearly all other eukaryotes. Bdelloid genomes show a high proportion of non-metazoan genes, acquired by horizontal transfer. This well-substantiated finding has invited speculation that homologous horizontal transfer between rotifers also may occur, perhaps at rates sufficient to "replace" the functions of sex in bdelloids. In 2016, Debortoli and colleagues claimed to supply evidence for this hypothesis (*Current Biology* 26, 723-32). They sampled individuals of the bdelloid genus *Adineta* from natural populations, extracted DNA and sequenced five marker loci. For several samples, the assignment of haplotypes to species was incongruent among loci, which the authors interpreted as evidence of "interspecific horizontal genetic transfers". Here, we use sequencing chromatograms supplied by the authors to demonstrate that samples treated as single individuals actually contained mitochondrial and ribosomal haplotypes from two or even three animals. We also show that the putatively transferred DNA molecules share only 75% sequence identity, which is not compatible with known mechanisms of homologous recombination, or with established features of bdelloid genomes. We argue that these and other patterns are parsimoniously explained by cross-contamination of animals or DNA between sample tubes, and therefore that the study offers no reliable evidence for the hypothesis that genes are transferred either within or between these bdelloid species. In light of this and other recent cases, we recommend that work considering horizontal gene transfer in microscopic animals be conducted and evaluated with special caution in future, owing to the risk of contamination.

## Background

The maintenance of sexual reproduction is a fundamental evolutionary problem. In theory, an obligately asexual population will grow at twice the rate of a competing sexual population, half of which are males that cannot produce eggs (Maynard Smith 1978). Despite this and other costs (Lehtonen et al. 2012), sex is nearly universal among eukaryotes (Speijer et al. 2015), whereas obligately asexual lineages are rare and typically short-lived (Bell 1982; Burt 2000). Various genetic and ecological hypotheses have been proposed to explain this paradox (Kondrashov 1993; Hartfield & Keightley 2012), but definitive tests are lacking, in part because it is challenging to identify appropriate study systems (Lehtonen et al. 2012; Meirmans et al. 2012).

One approach is to investigate groups that seem to have evolved over extended timescales without sex (Judson & Normark 1996; Normark et al. 2003). Whatever mechanism maintains sex ought to be absent or unusually mitigated in these exceptional groups, whose genetics and ecology may thus help illuminate the rules that maintain sex everywhere else. However, that approach first requires that the remarkable claim of longstanding asexuality be rigorously established. Only a handful of 'ancient asexual' candidates have been identified, and some are subject to ongoing doubt (Lunt 2008; Schurko et al. 2009), especially when extant populations continue to invest in males (Palmer & Norton 1991; Smith et al. 2006; Schwander et al. 2013). Many are difficult to study owing to long generation times and other obstacles to culture (Van Doninck et al. 2002). Attention has therefore focused on rotifers of the Class Bdelloidea, which are tractable in the laboratory and field (Ricci 1984; Mark Welch & Meselson 1998a; Fontaneto et al. 2008; Wilson & Sherman 2010, 2013).

Bdelloid rotifers are microscopic filter-feeding invertebrates, about 100-500µm long (Donner 1965). They live in nearly every freshwater habitat worldwide, however tiny or ephemeral, thanks to their tolerance for extreme conditions, including complete desiccation (Ricci 1987). Bdelloidea comprises nearly 500 described species (Segers 2007), though molecular surveys suggest the number of cryptic taxa may be orders of magnitude higher (Fontaneto et al. 2009, 2011; Robeson et al. 2011). The primary indication of longstanding asexuality is the absence of evidence for males in any species despite centuries of observation (Hudson & Gosse 1886; Mark Welch et al. 2009; Birky 2010). Cytology provides further suggestive evidence: *Philodina roseola* has 13 chromosomes, including three without apparent morphological homologs, and oogenesis does not involve chromosomal reduction or synapsis (Hsu 1956; Mark Welch & Meselson 1998b).

Several features of bdelloid genomes have attracted attention as possible evidence for longstanding asexuality, or as potentially important in that theoretical context. Bdelloids have far fewer vertically transmitted retrotransposons than other animals (Arkhipova & Meselson 2000; Flot et al. 2013). This is predicted by selfish DNA theory under long-term asexuality, which curtails passage of these elements to new genetic backgrounds (Hickey 1982). Without recombination, alleles on formerly paired chromosomes were predicted to diverge in sequence (Birky 1996), and deeply divergent gene copies in certain bdelloid species were initially interpreted as former alleles that had been evolving independently for millions of years (Mark Welch & Meselson 2000). However, up to four gene copies were found rather than the two predicted for anciently asexual diploids. Later work clarified that bdelloids are ancestrally tetraploid (Mark Welch et al. 2008). Ancient polyploidisation or hybridisation seems to have produced four copies of each gene, which now form two pairs of closely related sequences (Hur et al. 2009). Each pair diverges deeply from the other pair, and the two parallel gene lineages no longer seem capable of genetic exchange (e.g. homology is 86% for two copies of the heat-shock gene *hsp82* in *P. roseola*). By convention, a typical gene has a closely related 'homolog', and a pair of distantly related 'ohnologs' (Flot et al. 2013). Within pairs, homologous copies are similar or identical, which implies some ongoing homogenising mechanism whose nature is unclear. It has been speculated that homologs serve as reciprocal templates for the repair of DNA double-strand breaks (DSB) after desiccation, and that break-induced replication, recombination and gene conversion mediate concerted evolution between them (Gladyshev & Meselson 2008; Mark Welch et al. 2008; Flot et al. 2013; Hespeels et al. 2014).

Another remarkable feature of bdelloid genomes has caused particular excitement, as it involves sharing of genetic material, and may thereby relate to sex. Bdelloids have a very high proportion of genes of non-metazoan origin, which indicates exceptional rates of horizontal gene transfer (HGT) from foreign sources (Gladyshev et al. 2008). Initial claims of this kind in other animals (e.g. Boothby et al. 2015) have been rejected as artefacts of contamination after more careful analysis (Delmont & Eren 2016; Koutsovoulos et al. 2016; Richards & Monier 2016). However, several independent lines of evidence consistently support the hypothesis of massive inter-kingdom HGT in multiple bdelloid species (Gladyshev et al. 2008; Boschetti et al. 2012; Flot et al. 2013; Eyres et al. 2015). Even stringent analyses recover a proportion of foreign genes far higher than other metazoans examined (Crisp et al. 2015). The majority appear bacterial in origin, but fungal, plant and archaeal genes also are represented (Boschetti et al. 2012). Animal genes have probably been acquired horizontally too, but these are not readily distinguished against a metazoan background.

How and why bdelloids have accumulated so many foreign genes remains unclear. One hypothesis is that environmental DNA is incorporated during recovery from desiccation, when cell membranes are compromised and extensive DNA damage is repaired (Gladyshev et al. 2008; Hespeels et al. 2014). However, at least one desiccation-tolerant tardigrade shows no such accumulation (Hashimoto et al. 2016), whereas desiccation-intolerant bdelloids seem to go on acquiring foreign genes (Eyres et al. 2015). Regardless of mechanism, the absolute rate of stable incorporation of foreign genes is estimated to be low: on the order of ten events per million years (Eyres et al. 2015).

When first describing HGT to bdelloids from non-metazoans, Gladyshev et al. (2008) speculated that "there may also be homologous replacement by DNA segments released from related individuals", and thus "bdelloid rotifers may experience genetic exchange resembling that in sexual populations". This attempt to link two striking genetic traits has a superficial appeal, but difficulties arise in light of evolutionary theory. Sex has genome-wide consequences each generation via segregation, crossing-over, independent assortment, outcrossing and sexual selection. These effects underpin a plethora of formal models for the maintenance of amphimixis (Kondrashov 1993). Local horizontal transfer, homologous or otherwise, has very different population genetic outcomes (Redfield 2001; Narra & Ochman 2006; Agrawal 2009). Even bacterial HGT is not a simple analog of meiotic sex (Redfield 2001; Croucher et al. 2016). Despite these issues, efforts have been made to confirm the idea that HGT occurs regularly between bdelloid rotifers, and is sufficient to "replace" sex (e.g. Flot et al. 2013). Here, we discuss some recent work purporting to supply evidence for that view.

# **The study of Debortoli et al. (2016)**

Debortoli et al. (2016) collected lichen and soil from five trees in a small area and looked for rotifers of the cosmopolitan bdelloid genus *Adineta* (Hudson & Gosse 1886). They moved individuals to 576 tubes, from which they extracted DNA. They amplified a 0.6kb region of mitochondrial cytochrome oxidase I (mtCO1) by PCR. Using this common molecular barcode (Hebert et al. 2003), the authors delineated six molecular taxa (Pons et al. 2006), which they call "*Adineta vaga* Species A-F" (we follow this usage for convenience). A subset of 82 samples was selected to represent a range of mtCO1 haplotypes from these "cryptic species". The DNA in these tubes was subjected to whole-genome amplification, then four nuclear marker loci were further amplified by PCR and sequenced.

A majority of samples yielded sequences characteristic of a single species at all five loci. However, for six samples (7.3%), sequences at different loci matched two or even three different species. The

authors interpret this incongruence as "strong evidence" of "multiple cases" of "interspecific horizontal genetic transfers" from "donor species" to "recipient individuals." They conclude that they have discovered "an unexpected (and possibly unique)...ameiotic strategy of genetic exchange and recombination among asexual, morphologically female organisms", which they "propose here to call 'sapphomixis' (from the name of the Greek lesbian poetess Sappho and mixis 'mingling')."

This dataset features some surprising patterns that seem to require further clarification. In every case where incongruence was reported, the inferred "donor species" was recovered from the same maple or plane tree as the "recipient individual" at the time of sampling (Debortoli et al. 2016; Table S3). This is quite unexpected, since the genus *Adineta* subsumes vast cryptic diversity; even *A. vaga* comprises at least 36 independently evolving entities (Fontaneto et al. 2011; Robeson et al. 2011). Rotifers of this genus have high dispersal potential (Fontaneto et al. 2008; Wilson & Sherman 2013) and the lifespan of a patch of lichen is short in evolutionary terms. If genetic exchange occurs so promiscuously among such diverse and mobile animals, why should every "donor species" happen to be sampled in the same small area as the recipients at the same time? Even more striking, every case of incongruence involves a haplotype whose sequence is identical to a haplotype found 'natively' in one of the other 81 rotifers sampled, enabling the authors to construct a perfectly self-contained circular representation of the "transfers" (their Figure 4).

We hypothesised that the evidence interpreted as "interspecific genetic exchanges" might instead result from accidental cross-contamination of rotifers or rotifer DNA between tubes during sample preparation. This would explain the hermetically self-referencing pattern of incongruent haplotypes. Specifically, while isolating 576 individuals, more than one animal may occasionally have been added to a tube, or loose DNA fragments may have been introduced in the gut or on the surface of a focal individual. From personal experience, we find it can be technically challenging to isolate *Adineta* to Eppendorf tubes individually. The animals are small even when extended; if disturbed, they contract rapidly into tiny, motionless, transparent spheroids that stick tenaciously to plasticware and have about the same refractive index. These technical issues are discussed further in the Supplementary Material. If the isolation protocol used by Debortoli et al. (2016) resulted in cross-contamination of a subset of samples presented as single individuals, it would give the misleading appearance of "inter- and intraspecific genetic exchanges". Here, this alternative hypothesis is tested using two independent and complementary sources of evidence: original Sanger sequencing chromatograms provided by the authors, and alignments of genetic and genomic data from public repositories.

## Results and Discussion

### Experimental determination of the effects of cross-contamination on chromatograms

If samples showing "interspecific horizontal genetic transfers" contained DNA from more than one animal, additional haplotypes ought to be evident in chromatograms produced by Sanger sequencing of PCR amplicons. In particular, previous sequencing of thousands of rotifers indicates that each individual has only one mtCO1 haplotype (e.g. Fontaneto et al. 2009), therefore to find double peaks in mtCO1 chromatograms would provide evidence for contamination.

We conducted an experiment to determine the pattern of mtCO1 chromatogram peaks when two animals are present in one tube. We chose two bdelloid clones from our cultures: '*A. vaga* (AD008)', which supplied the reference genome for *A. vaga* (Flot et al. 2013), and '*Adineta* sp. (AD006)'. We prepared replicate Eppendorf tubes, either with a single individual, or deliberately contaminated with two individuals, one from each species (Supplementary Material). We extracted DNA and amplified the mtCO1 marker using the methods and primers described by Debortoli et al. (2016). Bidirectional chromatograms were generated by direct Sanger sequencing with the PCR primers.

The phred quality scores of the chromatogram files (Ewing & Green 1998) were only slightly and not significantly lower for tubes with two animals versus one (Q20; 90% vs. 92%, N=38, t=1.13, P = 0.26). Even when two animals were present, the vast majority of base calls (97.9-99.6%) matched a single species (Supplementary Material). The additional animal did not manifest as obvious double peaks at the expected polymorphic sites, but as small, subtle minority peaks, typically hidden in baseline noise (Kronick 1997) and sometimes missing entirely. Perhaps this is unsurprising: double peaks are seldom equal in height even when amplifying alleles from diploid heterozygotes (Kronick 1997). PCR is non-linear, and if two animals contribute substantially divergent templates, large biases in final amplicon representation may arise from small initial differences in numbers of cells or mitochondria, or the efficiency of lysis, DNA extraction, primer binding, denaturation, etc. (Mullis et al. 1994).

We developed a simple quantitative method to test whether the identity of the additional animal in our deliberately contaminated samples could be recovered from the pattern of minority peaks (Supplementary Material). We refer to this as ConTAMPR (Contingency Table Analysis of Minority Peak Ranks). Briefly, chromatograms were aligned bidirectionally with the known majority sequence and that of the contaminant *Adineta* clone. At each site where the two haplotypes differed, we

manually ranked the heights of the fluorescence trace lines corresponding to the three minority nucleotide bases, and recorded the rank for the base fitting the contaminant haplotype. Contingency table analysis was used to test whether the distribution of peak height ranks differed from the expectation if chromatogram noise were random. For additional rigor, we measured the distribution of minority peaks fitted to a control species (*A. ricciae*, Segers & Shiel 2005) that was not present in any sample, but whose sequence identity to both AD006 and AD008 at mtCO1 was equal (87.5%).

In uncontaminated single-animal samples with *A. sp.* (AD006), the rank distributions of minority peaks matching *A. vaga* (AD008) and *A. ricciae* did not differ significantly from the null expectation or from each other (Figure 1A;  $\chi^2 = 3.32$ , d.f. = 4,  $P = 0.51$ ). In deliberately contaminated samples, however, minority peaks fitted the known contaminant species better than the null expectation (Figure 1B;  $\chi^2=174.54$ , d.f. =2,  $P < 2.2 \times 10^{-16}$ ) or the control species ( $\chi^2=22.54$ , d.f. =2,  $P = 1.27 \times 10^{-5}$ ). The analysis correctly detected that tubes contained two animals, identified the second haplotype and differentiated it from other candidates. Similar results were obtained over multiple biological and technical replicates (Supplementary Material). This approach works because PCR amplicons are directly sequenced, leaving visual evidence of minority sequences. Cloning-based methods might easily miss minority haplotypes unless very many clones are sequenced for each reaction (Mullis et al. 1994). Debortoli et al. (2016) also employed direct sequencing, and so the same method could be applied to test whether their samples were cross-contaminated with DNA from multiple animals.

# **Evidence of cross-contamination in samples treated as individuals by Debortoli et al. (2016)**

To test for the signatures described above, we requested original chromatogram files from Debortoli and colleagues. We were provided with 36 out of at least 1152 mtCO1 chromatograms, including files for the six samples where "interspecific genetic exchanges" were claimed. We also received 483 out of at least 656 chromatograms for 28S ribosomal DNA, and 133 out of at least 158 files corresponding to the EPIC25 (exon-primed intron-crossing) nuclear marker. We appreciate the open and collaborative spirit in which the authors shared their data.

Sample B11 was the first alphabetically to show "interspecific recombination". It was interpreted by Debortoli et al. as a single animal (Individual 21) belonging to *A. vaga* Species A, with one mtCO1 haplotype (Hap6 [A]), and one 28S ribosomal haplotype (Hap1 [A]). However, at other nuclear loci, haplotypes were putatively transferred from Species E: EPIC25 Hap35, EPIC 63 Hap16 and Nu1054 Hap22. As discussed above, all three haplotypes also were found 'natively' in other animals sampled



during the study. Indeed, Table S3 of Debortoli et al. (2016) shows that they all occurred together in a single animal: Individual 81 [E]. Contamination of Sample B11 with a second animal similar to this would explain the apparently incongruent signal. If so, the mtCO1 chromatograms for Sample B11 ought to show evidence of a second haplotype that looks like Hap31 [E], as seen in Individual 81.

We tested this prediction using ConTAMPR (Figure 1C). The fit of minority peaks to Hap31 [E] was significantly better than the null expectation ( $\chi^2=127.95$ , d.f. =2,  $P < 2.2 \times 10^{-16}$ ) or the fit to *A. ricciae* ( $\chi^2=25.39$ , d.f. =,  $P = 3.07 \times 10^{-6}$ ). We attempted to match the minority peaks to multiple control sequences, including the other five species (B, C, D, E, F) reported by Debortoli et al., as well as *A. ricciae* and the *A. vaga* reference genome (Figure 2). Hap31 [E] matches the chromatograms much better than any other species ( $\chi^2=39.2$ , d.f. =12,  $P = 9.73 \times 10^{-5}$ ). Like other animals, individual rotifers are not known to have two substantially divergent mtCO1 haplotypes. This evidence suggests that Sample B11 contained a second animal belonging to Species E, very similar to Individual 81 [E]. A parsimonious inference is that this rotifer supplied the incongruent Species E haplotypes at other loci, where "interspecific genetic exchanges" were claimed.

Although mtCO1 was amplified directly from genomic DNA, Debortoli et al. performed PCR for the 28S, EPIC25, EPIC63 and Nu1054 nuclear markers after whole-genome amplification (WGA) of the samples via an Illustra GenomiPhi V2 DNA Amplification Kit (GE Healthcare, Amersham Biosciences). When DNA from two animals was present, haplotypes were very unequally represented among our PCR amplicons (Figure 1B). Interposing another nonlinear amplification step introduces further opportunities for bias: some haplotypes might be dropped entirely, or a majority of amplicons might be generated from a minority template. In particular, this kit has a known bias in favor of templates with lower guanine-cytosine (GC) content (Han et al. 2012), which we suggest may be an important factor in selective loss of haplotypes (Supplementary Material). For these reasons, it was less clear whether nuclear loci would show evidence of a second animal. However, we attempted to conduct the same analysis, first at the ribosomal 28S marker. The putative second animal was predicted to show a 28S haplotype characteristic of Species E.

As predicted, the fit of minority peaks to Species E differed significantly from the null expectation, more than any other species (Figure 3). Species E fitted significantly better than Species F ( $\chi^2=22.45$ , d.f. = 2,  $P = 1.3 \times 10^{-5}$ ), or B ( $\chi^2=12.75$ , d.f. = 2,  $P = 0.0017$ ), or C ( $\chi^2=12.24$ , d.f. = 2,  $P = 0.0022$ ) or *A. ricciae* ( $\chi^2 = 11.13$ , d.f. = 2,  $P = 0.0038$ ). These differences remain significant even if a conservative Bonferroni correction is applied ( $\alpha = 0.0083$ ). Species E was also a better fit than Species D and the



*A. vaga* reference genome, but this was not significant because these species are nearly identical at the highly conserved 28S marker. Overall, the match to the secondary peaks recapitulates a phylogenetic tree based on 28S (Figure 3), with species more closely related to E fitting better. The evidence at 28S therefore is consistent with the evidence from mtCO1, indicating a second animal belonging to Species E. Because Debortoli et al. (2016) already reported Species E haplotypes at EPIC25, EPIC63 and Nu1054, evidence from all five sequenced loci is now brought into congruence, as predicted if Sample B11 contained an animal belonging to Species E, with haplotype combinations similar to those seen in Individual 81.

We used the same methods to investigate the other five samples where Debortoli et al. diagnosed "interspecific horizontal genetic transfers" based on incongruence of species assignment among loci. Where the relevant chromatograms were provided, we aligned them in both directions against the haplotype(s) reported by Debortoli et al., then analysed the pattern of minority peaks with reference to the haplotypes of other *Adineta* species reported in the study (Supplementary Material).

All six samples showed significant evidence of additional haplotypes that were not reported by Debortoli et al. (Table 1). Three samples (B11, B22, B39) each contained two clearly identifiable mtCO1 haplotypes, which is only consistent with DNA from more than one animal. Even if mtDNA itself could participate in interspecific horizontal transfers (as Debortoli et al. imply for Sample B39), intergenerational bottlenecking of mitogenomes (Mishra & Chan 2014) would still result in a single mtCO1 haplotype (J.-F. Flot, pers. comm), as seen in thousands of rotifers previously sequenced. In samples B11, B14 and B22, evidence of additional 28S haplotypes was found. This is not an expected outcome of HGT, because ribosomal DNA undergoes concerted evolution (Liao 2000) that is believed to preclude the maintenance of two substantially dissimilar 28S haplotypes in a single rotifer, even if one arrived horizontally (N. Debortoli, J.-F. Flot & K. Van Doninck, pers. comm.). Ribosomal markers have been amplified from hundreds of rotifers without finding copies that differ by more than a handful of bases (e.g. Tang et al. 2012). Debortoli et al. sequenced 82 individuals without finding more than three base differences between 28S copies in any animal (their Figure 3A). In contrast, the two haplotypes found in Samples B14 and B22 differ at over 40 positions in only the first 700bp fragment. As a consequence of multiple peaks from these additional haplotypes, quality scores for 28S chromatograms were significantly lower in samples where transfer was claimed than those where it was not (Figure 4; Mann-Whitney Test: N=122, W=373.5, P=0.015).

In two samples (B14 and B3B1), there was evidence of DNA originating in three different rotifers (from species A, C and E). The mtCO1 chromatograms for these samples were extreme outliers in quality scores (Figure 5), and too noisy to narrow down the minority peaks to just one candidate (Table 1, Supplementary Material). Samples B39 and D14 showed evidence of the expected 'native' haplotypes that were supposed to have been replaced by horizontal transfer. All loci in both samples are now brought into congruence; a parsimonious inference is that they represent typical animals with haplotype associations similar to conspecifics. The incongruent sequences arose either from WGA or PCR amplification of contaminating DNA fragments, or from a second animal whose haplotypes were dropped during amplification at other loci (Supplementary Material).

Consistent with biased or capricious amplification, the predicted 'native' haplotype in Sample D14 was almost equivalent in peak strength to the "interspecific" haplotype after one PCR, but absent among amplicons from a second PCR using the same tube of template (Supplementary Material). If the locus had only been amplified once, there might have been no evidence of the native sequence, and the case for "interspecific recombination" would have been harder to reject. A lack of minority peaks after the second PCR confirms an important message in this dataset: even when a sample has two different sequences, one may fail to appear in any given whole-genome amplification or PCR. A significant pattern of minority peaks is thus sufficient but not necessary to indicate a second haplotype, whereas the absence of such a pattern is necessary but not sufficient to exclude it.

The sequencing evidence confirms that a subset of samples prepared by Debortoli et al. (2016) were cross-contaminated with DNA from multiple animals belonging to different species. This may quite simply explain why incongruent haplotypes always matched a "donor species" that happened to be sampled from the same tree. Elsewhere in the publication, the authors also claim evidence for "intraspecific haplotype sharing". In light of the results, it seems parsimonious to infer that these patterns also arise from cross-contamination, this time involving individuals or DNA belonging to the same species, which would be far less obvious from chromatograms or other analyses. Interestingly, the incidence of proposed intraspecific transfer in species A and C was approximately 10%, and it now appears that at least 7% of tubes contained DNA from more than one animal. It would be surprising if all tube-sharing events in the study happened to involve individuals of different species.

**“Interspecific recombination” events are not mechanistically compatible with genomic evidence**

We believe mechanistic considerations independently falsify the hypothesis of "interspecific recombination" presented by Debortoli et al. (2016). According to the authors, transfers "may be mediated by DSB repair through homologous recombination (HR)". In their view, "this hypothesis is reinforced by the observation that...the transferred sequences replaced the original copies", and they "speculate that, after the integration of DNA, gene conversion promptly copied the integrated DNA on its homologous region". This last hypothetical step is critical because each gene in the degenerate tetraploid genome of *A. vaga* has a closely similar paired homolog, and the pairs undergo concerted evolution (Mark Welch et al. 2008; Flot et al. 2013).

In the context of HGT, Thomas and Nielsen (2005) define HR as "recombination that depends on extensive segments of high sequence similarity between two DNA molecules" (p. 714). As Debortoli et al. themselves remark, the frequency of HR "is strongly correlated with the degree of identity between the recombining DNA fragments and dramatically declines as the sequences diverge." A log-linear decline in HR with decreasing sequence identity is well established in bacteria (Watt et al. 1985; Zawadzki et al. 1995; Vulić et al. 1997; Majewski 2001; Thomas & Nielsen 2005); protists (Bell & McCulloch 2003); yeast (Datta et al. 1997); plants (Opperman et al. 2004; Li et al. 2006) and animals (Larocque & Jasin 2010; Do & LaRocque 2015). Datta et al. (1997) found that even a single mismatched base (99.7% identity) reduced HR rates fourfold in yeast. Reductions to 99% or 90% identity reduced HR rates by one and two orders of magnitude respectively. To this point, the relationship is largely governed by active mismatch repair systems, and HR does not decline so dramatically if these are abolished. However, when sequences fall below 90% identity, rates of HR decline exponentially even in mutants devoid of mismatch repair, indicating that the machinery of HR itself fails to engage when so many bases are mispaired (Datta et al. 1997). At 83.5% identity, HR is effectively absent in yeast (three recombinant cells per billion: Datta et al. 1997), and rates were too low to measure even for otherwise promiscuous *Bacillus* species (Zawadzki et al. 1995).

Following this logic, Debortoli et al. write that "closely related species should be more prone to genetic exchanges, which would explain why our study, focusing on intrageneric variation within the morphospecies *A. vaga*, detected multiple cases of genetic transfers." Indeed, an extremely high frequency of HR is required to explain their data. Even at just the five loci examined, interspecific recombination was claimed for nearly 10% of the "individuals" sampled. The self-contained pattern of the results can only be accommodated if these events occurred so recently that all the putative donor species and recipient clones were still living together at the time of the study, with the transferred haplotypes remaining identical between them. Moreover, HR must have occurred at

least twice in each case: once when the exogenous DNA was first integrated, and again within the recipient genome, when "gene conversion promptly copied the integrated DNA on its homologous region". Given the sequence-based constraints on HR, the species involved would need to have a very high level of sequence identity, to recombine so readily, recently and frequently.

We tested this prediction for each case of "interspecific recombination" using a simple method. We aligned each incongruent haplotype from a putative donor species against the native haplotype it was supposed to have replaced, and measured pairwise identity between them (Supplementary Material). This recreates the genetic divergences across which Debortoli et al. posit multiple, recent HR events (Table 2). The mean identity between sequences undergoing putative interspecific recombination is just 74.8% (median 72.3%). This surprising figure was validated for a genomic region of approximately 10kb around the 400bp EPIC25 intronic marker (Supplementary Material). Identity values were the same or lower regardless whether we considered exons, introns or intergenic regions. These values are not compatible with current understanding of HR in the model systems discussed above. They also seem incompatible with current views of homologous exchange in the genome of *A. vaga* itself. A recent assembly (Flot et al. 2013) indicates that gene conversion and concerted evolution occur between sequence pairs that "are on average 96.2% identical at the nucleotide level (median = 98.6%)." Debortoli et al. (2016) claim "interspecific recombination" between sequences approximately an order of magnitude more divergent.

The tetraploid genome of *A. vaga* supplies a second critical benchmark: each homologous pair of genes has a pair of 'ohnologous' copies whose mean identity is "73.6% (median = 75.1%)" (Flot et al. 2013). This is very close to the value calculated for "interspecific horizontal genetic transfers", yet ohnologs have been evolving independently for millions of years within the same genomes, cells, individuals and clones, with "no conspicuous tracts of identity" between them (Hur et al. 2009). This feature of *A. vaga* militates strongly against the claim that molecules with 74.8% sequence identity could undergo frequent recombination or gene conversion within this genome, still less horizontally.

We considered the possibility that "interspecific recombination" might be mediated by some alternative mechanism with less stringent identity requirements than HR. For instance, microhomology-mediated end joining involves "the use of 5–25 bp microhomologous sequences during the alignment of broken ends before joining" (McVey & Lee 2008). We measured the degree of microhomology between two "transferred" EPIC25 regions at all scales from 1-40bp (Supplementary Material). They were no more similar than 7650 independently evolving ohnologous

pairs in the same genome, consistent with the results of global homology contrasts. One of the sequences even shared more microhomology with its own ohnolog (the EPIC63 region) than with its "transfer" partner. This seems to exclude the hypothesis that microhomology-based mechanisms mediate interspecific HGT. If that were so, ohnologous loci could not evolve independently, as they share at least as much microhomology at every scale, and their DNA must be more abundant and accessible in any genome, cell or individual than DNA arriving across horizontal barriers.

Integration of DNA over great genetic distances must be possible at least occasionally in bdelloid rotifers, since foreign genes with no homology to metazoan sequences are incorporated (Gladyshev et al. 2008). However, the mechanism in these cases would not require homologous substitution, nor does it appear sufficiently frequent or sequence-dependent to prevent ohnologs evolving independently (Eyres et al. 2015). It may involve a series of individually unlikely events or conditions, in which case direct demonstrations may be more challenging than anticipated.

## Conclusions

Debortoli et al. (2016) claimed to supply "strong evidence that inter- and intraspecific DNA exchanges occur within the bdelloid rotifer genus *Adineta*." Sequencing data provided by the authors demonstrates that samples treated as individuals were cross-contaminated with DNA from multiple rotifers, whose identities we reconstructed in multiple cases. The probabilities that these patterns could emerge from random noise are vanishingly small (Table 1). Unintentional cross-contamination parsimoniously explains the results of Debortoli et al. (2016) without reference to extraordinary or novel genetic phenomena. We can reject the 'middle ground' argument that some fraction of transfers are real and some are artefacts, because genomic alignments show that interspecific recombination is not a mechanistically credible interpretation for any of the incongruent haplotypes the authors report. Sequence identities are not compatible with homology-based substitution even within the *A. vaga* genome, still less with HGT at the rates the dataset implies. Cross-contamination explains these patterns, and would remain the most plausible interpretation even had it been less evident in chromatograms. In our view, these analyses constitute clear evidence that the findings of Debortoli et al. (2016) are unreliable. The interesting hypothesis that "bdelloid individuals of the genus *Adineta* exchange DNA within and between species" may be true or false, but the work supplies no credible evidence to address that question.

The study appears to have met with broad acceptance (Krause et al. 2016; Ram & Hadany 2016; Sharp & Otto 2016; Tilquin & Kokko 2016), perhaps because bdelloid asexuality has long been considered problematic (Maynard Smith 1986), and the study seemed to confirm the enticing solution that sex is "replaced" in bdelloids by HGT (Gladyshev et al. 2008; Flot et al. 2013). In our view, current formulations of this hypothesis are simplistic and imprecise, lacking sufficient mechanistic or theoretical detail to assess evolutionary plausibility or to guide empirical evaluation.

The work of Debortoli et al. (2016) was criticised by Signorovitch et al. (2016), who did not identify the issues discussed here, but were concerned that the results seemed incompatible with their own prior claim of "a striking pattern of allele sharing consistent with sexual reproduction and with meiosis of an atypical sort" in the bdelloid *Macrotrachela quadricornifera* (Signorovitch et al. 2015). We believe one negative conclusion of Debortoli et al. (2016) remains valid, namely that "our observations do not support the hypothesis of an *Oenothera*-like meiosis" in *Adineta*. That mechanism was predicted to generate a distinctive pattern of exactly concordant haplotypes that is clearly absent from the *Adineta* dataset, cross-contamination notwithstanding. The study of Signorovitch et al. (2015) itself features some patterns and arguments that seem to require empirical clarification, and we join the authors in "awaiting full genome sequencing of the allele-sharing individuals of *M. quadricornifera*" (Signorovitch et al. 2016), which will shed further light.

Schwander (2016) commented on the work of Signorovitch et al. (2015) and Debortoli et al. (2016), in an associated Dispatch titled "*The End of an Ancient Asexual Scandal*". In the assessment of Schwander, "both papers...provide direct evidence for some form of genetic exchange between bdelloid rotifer individuals". In her view, "these two studies show beyond doubt that genetic exchange between individuals occurs in different bdelloid species." Schwander takes the position that "even small amounts of recombination and genetic exchange between individuals appear to be enough to provide all the benefits of sex". Schwander therefore judges that "bdelloids should no longer be considered as asexuals" and that "the starring role of the most notorious asexual scandals should be transferred to a different group." With the advantage of hindsight, we suggest that some of these rather strong assertions might now be considered premature.

In the words of Maynard Smith (1986), bdelloid rotifers "remain something of an evolutionary scandal." Molecular inquiries have revealed some truly extraordinary features in these tiny and unassuming creatures (Arkhipova & Meselson 2000; Gladyshev et al. 2008; Mark Welch et al. 2008; Boschetti et al. 2012; Hespeels et al. 2014), inviting speculation about links to their unusual mode of

reproduction. It is tempting to seek confirmation of these exciting ideas, and to expect further extraordinary discoveries. However, that approach opens the door to well-known biases, both when interpreting data and when evaluating the work of others (Nickerson 1998). A more incremental programme based on falsification may better facilitate firm progress, and we recommend that work touching the molecular genetics of bdelloid rotifers be treated with heightened scrutiny in future. Evidence relating to 'non-canonical' forms of genetic exchange appears particularly susceptible to contamination and misinterpretation (Boothby et al. 2015), and we join others in recommending even greater stringency in these cases (Richards & Monier 2016). A cautious approach will help exploit the unusual leverage that bdelloids offer on fundamental evolutionary and genetic questions.

# **Acknowledgements**

We again sincerely thank N. Debortoli, K. Van Doninck and J.-F. Flot for freely sharing sequencing chromatograms to help us test the alternative hypothesis we had proposed. This open approach goes beyond standard practice for sharing sequencing data, which perhaps ought to be revisited. We have very much appreciated their transparent and scholarly conduct, and their thoughtful and collegial correspondence since we first communicated these issues in April 2016. We are grateful to M. Blaxter and G. Koutsovoulos for comments on the manuscript. This work was funded in part by a NERC Postdoctoral Fellowship (NE/J01933X/1) to C.G.W., and NERC grant NE/M01651X/1 to T.G.B.



# References

1. Agrawal, A.F. (2009). Spatial heterogeneity and the evolution of sex in diploids. *Am. Nat.*, 174, S54–S70
2. Arkhipova, I. & Meselson, M. (2000). Transposable elements in sexual and ancient asexual taxa. *Proc. Natl. Acad. Sci. U. S. A.*, 97, 14473–7
3. Bell, G. (1982). *The masterpiece of nature: the evolution and genetics of sexuality*. Croom Helm, London
4. Bell, J.S. & McCulloch, R. (2003). Mismatch repair regulates homologous recombination, but has little influence on antigenic variation, in *Trypanosoma brucei*. *J. Biol. Chem.*, 278, 45182–45188
5. Birky, C.W. (1996). Heterozygosity, heteromorphy, and phylogenetic trees in asexual eukaryotes. *Genetics*, 144, 427–437
6. Birky, C.W. (2010). Positively negative evidence for asexuality. *J. Hered.*, 101 Suppl, S42-5
7. Boothby, T.C., Tenlen, J.R., Smith, F.W., Wang, J.R., Patanella, K.A., Osborne Nishimura, E., *et al.* (2015). Evidence for extensive horizontal gene transfer from the draft genome of a tardigrade. *Proc. Natl. Acad. Sci.*, 112, 15976–15981
8. Boschetti, C., Carr, A., Crisp, A., Eyres, I., Wang-Koh, Y., Lubzens, E., *et al.* (2012). Biochemical diversification through foreign gene expression in bdelloid rotifers. *PLoS Genet.*, 8, e1003035
9. Burt, A. (2000). Sex, recombination, and the efficacy of selection—Was Weismann right? *Evolution*, 54, 337–351
10. Crisp, A., Boschetti, C., Perry, M., Tunnacliffe, A. & Micklem, G. (2015). Expression of multiple

horizontally acquired genes is a hallmark of both vertebrate and invertebrate genomes. *Genome Biol.*, 16

11. Croucher, N.J., Mostowy, R., Wymant, C., Turner, P., Bentley, S.D. & Fraser, C. (2016). Horizontal DNA transfer mechanisms of bacteria as weapons of intragenomic conflict. *PLoS Biol.*, 14, 1–42

12. Datta, A., Hendrix, M., Lipsitch, M. & Jinks-Robertson, S. (1997). Dual roles for DNA sequence identity and the mismatch repair system in the regulation of mitotic crossing-over in yeast. *Proc. Natl. Acad. Sci. U. S. A.*, 94, 9757–62

13. Debortoli, N., Li, X., Eyres, I., Fontaneto, D., Hespeels, B., Tang, C.Q., *et al.* (2016). Genetic exchange among bdelloid rotifers is more likely due to horizontal gene transfer than to meiotic sex. *Curr. Biol.*, 26, 723–732

14. Delmont, T.O. & Eren, A.M. (2016). Identifying contamination with advanced visualization and analysis practices: metagenomic approaches for eukaryotic genome assemblies. *PeerJ*, 4, e1839

15. Do, A.T. & LaRocque, J.R. (2015). The role of *Drosophila* mismatch repair in suppressing recombination between diverged sequences. *Sci. Rep.*, 5, 17601

16. Van Doninck, K., Schön, I., De Bruyn, L. & Martens, K. (2002). A general purpose genotype in an ancient asexual. *Oecologia*, 132, 205–212

17. Donner, J. (1965). *Ordnung Bdelloidea*. Akademie-Verlag, Berlin

18. Ewing, B. & Green, P. (1998). Base-calling of automated sequencer traces using phred. II. Error probabilities. *Genome Res.*, 8, 186–194

19. Eyres, I., Boschetti, C., Crisp, A., Smith, T.P., Fontaneto, D., Tunnacliffe, A., *et al.* (2015). Horizontal gene transfer in bdelloid rotifers is ancient, ongoing and more frequent in species from

desiccating habitats. *BMC Biol.*, 13, 90

20. Flot, J., Hespeels, B., Li, X., Noel, B., Arkhipova, I., Danchin, E.G.J., *et al.* (2013). Genomic evidence for ameiotic evolution in the bdelloid rotifer *Adineta vaga*. *Nature*, 500, 453–457

21. Fontaneto, D., Barraclough, T.G., Chen, K., Ricci, C. & Herniou, E. a. (2008). Molecular evidence for broad-scale distributions in bdelloid rotifers: everything is not everywhere but most things are very widespread. *Mol. Ecol.*, 17, 3136–46

22. Fontaneto, D., Iakovenko, N., Eyres, I., Kaya, M., Wyman, M. & Barraclough, T.G. (2011). Cryptic diversity in the genus *Adineta* Hudson & Gosse, 1886 (Rotifera: Bdelloidea: Adinetidae): A DNA taxonomy approach. *Hydrobiologia*, 662, 27–33

23. Fontaneto, D., Kaya, M., Herniou, E. a & Barraclough, T.G. (2009). Extreme levels of hidden diversity in microscopic animals (Rotifera) revealed by DNA taxonomy. *Mol. Phylogenet. Evol.*, 53, 182–9

24. Gladyshev, E. a., Meselson, M. & Arkhipova, I.R. (2008). Massive horizontal gene transfer in bdelloid rotifers. *Science*, 320, 1210–1213

25. Gladyshev, E. & Meselson, M. (2008). Extreme resistance of bdelloid rotifers to ionizing radiation. *Proc. Natl. Acad. Sci. U. S. A.*, 105, 5139–44

26. Han, T., Chang, C.-W., Kwekel, J.C., Chen, Y., Ge, Y., Martinez-Murillo, F., *et al.* (2012). Characterization of whole genome amplified (WGA) DNA for use in genotyping assay development. *BMC Genomics*, 13, 217

27. Hartfield, M. & Keightley, P.D. (2012). Current hypotheses for the evolution of sex and recombination. *Integr. Zool.*, 7, 192–209

28. Hashimoto, T., Horikawa, D.D., Saito, Y., Kuwahara, H., Kozuka-Hata, H., Shin-I, T., *et al.* (2016). Extremotolerant tardigrade genome and improved radiotolerance of human cultured cells by tardigrade-unique protein. *Nat. Commun.*, 7, 12808
29. Hebert, P.D.N., Cywinska, A., Ball, S.L. & deWaard, J.R. (2003). Biological identifications through DNA barcodes. *Proc. R. Soc. B Biol. Sci.*, 270, 313–321
30. Hespeels, B., Knapen, M., Hanot-Mambres, D., Heuskin, A.C., Pineux, F., Lucas, S., *et al.* (2014). Gateway to genetic exchange? DNA double-strand breaks in the bdelloid rotifer *Adineta vaga* submitted to desiccation. *J. Evol. Biol.*, 27, 1334–1345
31. Hickey, D.A. (1982). Selfish DNA: a sexually-transmitted nuclear parasite. *Genetics*, 101, 519–531
32. Hsu, W.S. (1956). Oogenesis in the Bdelloidea rotifer *Philodina roseola* Ehrenberg. *Biol. Bull.*, 57, 283–296
33. Hudson, C.T. & Gosse, P.H. (1886). *The Rotifera; or Wheel-Animalcules*. Longmans, Geen & Co., London
34. Hur, J.H., Van Doninck, K., Mandigo, M.L. & Meselson, M. (2009). Degenerate tetraploidy was established before bdelloid rotifer families diverged. *Mol. Biol. Evol.*, 26, 375–83
35. Judson, O.P. & Normark, B.B. (1996). Ancient asexual scandals. *Trends Ecol. Evol.*, 11, 41–6
36. Kondrashov, A.S. (1993). Classification of hypotheses on the advantage of amphimixis. *J. Hered.*, 84, 372–87
37. Koutsovoulos, G., Kumar, S., Laetsch, D.R., Stevens, L., Daub, J., Conlon, C., *et al.* (2016). No evidence for extensive horizontal gene transfer in the genome of the tardigrade *Hypsibius dujardini*. *Proc. Natl. Acad. Sci.*, 113, 5053–5058

38. Krause, A., Pacht, P., Schulz, G., Lehmitz, R., Seniczak, A., Schaefer, I., *et al.* (2016). Convergent evolution of aquatic life by sexual and parthenogenetic oribatid mites. *Exp. Appl. Acarol.*, 70, 439–453
39. Kronick, M.N. (1997). Heterozygote determination using automated DNA sequencing technology. In: *Laboratory Methods for the Detection of Mutations and Polymorphisms in DNA* (ed. Taylor, G.R.). CRC Press, pp. 175–190
40. Larocque, J.R. & Jasin, M. (2010). Mechanisms of recombination between diverged sequences in wild-type and BLM-deficient mouse and human cells. *Mol. Cell. Biol.*, 30, 1887–1897
41. Lehtonen, J., Jennions, M.D. & Kokko, H. (2012). The many costs of sex. *Trends Ecol. Evol.*, 27, 172–178
42. Li, L., Jean, M. & Belzile, F. (2006). The impact of sequence divergence and DNA mismatch repair on homeologous recombination in *Arabidopsis*. *Plant J.*, 45, 908–916
43. Liao, D. (2000). Gene conversion drives within genic sequences: concerted evolution of ribosomal RNA genes in bacteria and archaea. *J. Mol. Evol.*, 51, 305–17
44. Lunt, D.H. (2008). Genetic tests of ancient asexuality in root knot nematodes reveal recent hybrid origins. *BMC Evol. Biol.*, 8, 194
45. Majewski, J. (2001). Sexual isolation in bacteria. *FEMS Microbiol. Lett.*, 199, 161–169
46. Mark Welch, D. & Meselson, M. (2000). Evidence for the evolution of bdelloid rotifers without sexual reproduction or genetic exchange. *Science*, 288, 1211–5
47. Mark Welch, D.B., Mark Welch, J.L. & Meselson, M. (2008). Evidence for degenerate tetraploidy

in bdelloid rotifers. *Proc. Natl. Acad. Sci. U. S. A.*, 105, 5145–9

48. Mark Welch, D.B. & Meselson, M. (1998a). Measurements of the genome size of the monogonont rotifer *Brachionus plicatilis* and of the bdelloid rotifers *Philodina roseola* and *Habrotrocha constricta*. *Hydrobiologia*, 387, 395–402

49. Mark Welch, D.B., Ricci, C. & Meselson, M. (2009). Bdelloid rotifers: progress in understanding the success of an evolutionary scandal. In: *Lost Sex* (eds. Schön, I., Martens, K. & Dijk, P.). Springer Netherlands, Dordrecht, pp. 259–279

50. Mark Welch, J.L. & Meselson, M. (1998b). Karyotypes of bdelloid rotifers from three families. *Hydrobiologia*, 387, 403–407

51. Maynard Smith, J. (1978). *The Evolution of Sex*. Cambridge University Press, Cambridge

52. Maynard Smith, J. (1986). Contemplating life without sex. *Nature*, 324, 300–301

53. McVey, M. & Lee, S.E. (2008). MMEJ repair of double-strand breaks (director’s cut): deleted sequences and alternative endings. *Trends Genet.*, 24, 529–538

54. Meirmans, S., Meirmans, P.G. & Kirkendall, L.R. (2012). The costs of sex: facing real-world complexities. *Q. Rev. Biol.*, 87, 19–40

55. Mishra, P. & Chan, D.C. (2014). Mitochondrial dynamics and inheritance during cell division, development and disease. *Nat. Rev. Mol. Cell Biol.*, 15, 634–646

56. Mullis, K.B., Ferre, F. & Gibbs, R.A. (1994). *The polymerase chain reaction*. Birkhäuser, Boston

57. Narra, H.P. & Ochman, H. (2006). Of what use is sex to bacteria? *Curr. Biol.*, 16, 705–710

58. Nickerson, R.S. (1998). Confirmation bias: A ubiquitous phenomenon in many guises. *Rev. Gen. Psychol.*, 2, 175–220
59. Normark, B.B., Judson, O.P. & Moran, N.A. (2003). Genomic signatures of ancient asexual lineages. *Biol. J. Linn. Soc.*, 79, 69–84
60. Opperman, R., Emmanuel, E. & Levy, A.A. (2004). The effect of sequence divergence on recombination between direct repeats in arabidopsis. *Genetics*, 168, 2207–2215
61. Palmer, S.C. & Norton, R.A. (1991). Taxonomic, geographic and seasonal distribution of thelytokous parthenogenesis in the Desmonomata (Acari: Oribatida). *Exp. Appl. Acarol.*, 12, 67–81
62. Pons, J., Barraclough, T., Gomez-Zurita, J., Cardoso, A., Duran, D., Hazell, S., *et al.* (2006). Sequence-Based Species Delimitation for the DNA Taxonomy of Undescribed Insects. *Syst. Biol.*, 55, 595–609
63. Ram, Y. & Hadany, L. (2016). Condition-dependent sex: who does it, when and why? *Philos. Trans. R. Soc. B Biol. Sci.*, 371, 20150539
64. Redfield, R.J. (2001). Do bacteria have sex? *Nat. Rev. Genet.*, 2, 634–639
65. Ricci, C. (1984). Culturing of some bdelloid rotifers. *Hydrobiologia*, 112, 45–51
66. Ricci, C.N. (1987). Ecology of bdelloids: how to be successful. *Hydrobiologia*, 147, 117–127
67. Richards, T.A. & Monier, A. (2016). A tale of two tardigrades. *Proc. Natl. Acad. Sci.*, 113, 4892–4894
68. Robeson, M.S., King, a. J., Freeman, K.R., Birky, C.W., Martin, a. P. & Schmidt, S.K. (2011). Soil



rotifer communities are extremely diverse globally but spatially autocorrelated locally. *Proc. Natl. Acad. Sci.*, 1–5

69. Schurko, A.M., Neiman, M. & Logsdon, J.M. (2009). Signs of sex: what we know and how we know it. *Trends Ecol. Evol.*, 24, 208–17

70. Schwander, T. (2016). Evolution: the end of an ancient asexual scandal. *Curr. Biol.*, 26, R233–R235

71. Schwander, T., Crespi, B.J., Gries, R. & Gries, G. (2013). Neutral and selection-driven decay of sexual traits in asexual stick insects. *Proc. R. Soc. B*, 280, 20130823

72. Segers, H. (2007). Annotated checklist of the rotifers (Phylum Rotifera), with notes on nomenclature, taxonomy and distribution. *Zootaxa*, 1564, 1–104

73. Segers, H. & Shiel, R.J. (2005). Tale of a sleeping beauty: a new and easily cultured model organism for experimental studies on bdelloid rotifers. *Hydrobiologia*, 546, 141–145

74. Sharp, N.P. & Otto, S.P. (2016). Evolution of sex: Using experimental genomics to select among competing theories. *BioEssays*, 38, 751–757

75. Signorovitch, A., Hur, J., Gladyshev, E. & Meselson, M. (2015). Allele sharing and evidence for sexuality in a mitochondrial clade of bdelloid rotifers. *Genetics*, 200, 581–90

76. Signorovitch, A., Hur, J., Gladyshev, E. & Meselson, M. (2016). Evidence for meiotic sex in bdelloid rotifers. *Curr. Biol.*, 26, R754–R755

77. Smith, R.J., Kamiya, T. & Horne, D.J. (2006). Living males of the “ancient asexual” Darwinulidae (Ostracoda: Crustacea). *Proc. R. Soc. B*, 273, 1569–78

78. Speijer, D., Lukeš, J. & Eliáš, M. (2015). Sex is a ubiquitous, ancient, and inherent attribute of eukaryotic life. *Proc. Natl. Acad. Sci.*, 112, 8827–8834
79. Tang, C.Q., Leasi, F., Obertegger, U., Kieneke, A., Barraclough, T.G. & Fontaneto, D. (2012). The widely used small subunit 18S rDNA molecule greatly underestimates true diversity in biodiversity surveys of the meiofauna. *Proc. Natl. Acad. Sci.*, 109, 16208–16212
80. Thomas, C.M. & Nielsen, K.M. (2005). Mechanisms of, and barriers to, horizontal gene transfer between bacteria. *Nat. Rev. Microbiol.*, 3, 711–721
81. Tilquin, A. & Kokko, H. (2016). What does the geography of parthenogenesis teach us about sex? *Philos. Trans. R. Soc. B Biol. Sci.*, 371, 20150538
82. Vulić, M., Dionisio, F., Taddei, F. & Radman, M. (1997). Molecular keys to speciation: DNA polymorphism and the control of genetic exchange in enterobacteria. *Proc. Natl. Acad. Sci. U. S. A.*, 94, 9763–7
83. Watt, V.M., Ingles, C.J., Urdea, M.S. & Rutter, W.J. (1985). Homology requirements for recombination in *Escherichia coli*. *Proc. Natl. Acad. Sci.*, 82, 4768–4772
84. Wilson, C.G. & Sherman, P.W. (2010). Anciently asexual bdelloid rotifers escape lethal fungal parasites by drying up and blowing away. *Science*, 327, 574–576
85. Wilson, C.G. & Sherman, P.W. (2013). Spatial and temporal escape from fungal parasitism in natural communities of anciently asexual bdelloid rotifers. *Proc. R. Soc. B*, 280, 20131255
86. Zawadzki, P., Roberts, M.S. & Cohan, F.M. (1995). The log-linear relationship between sexual isolation and sequence divergence in *Bacillus* transformation is robust. *Genetics*, 140, 917–932

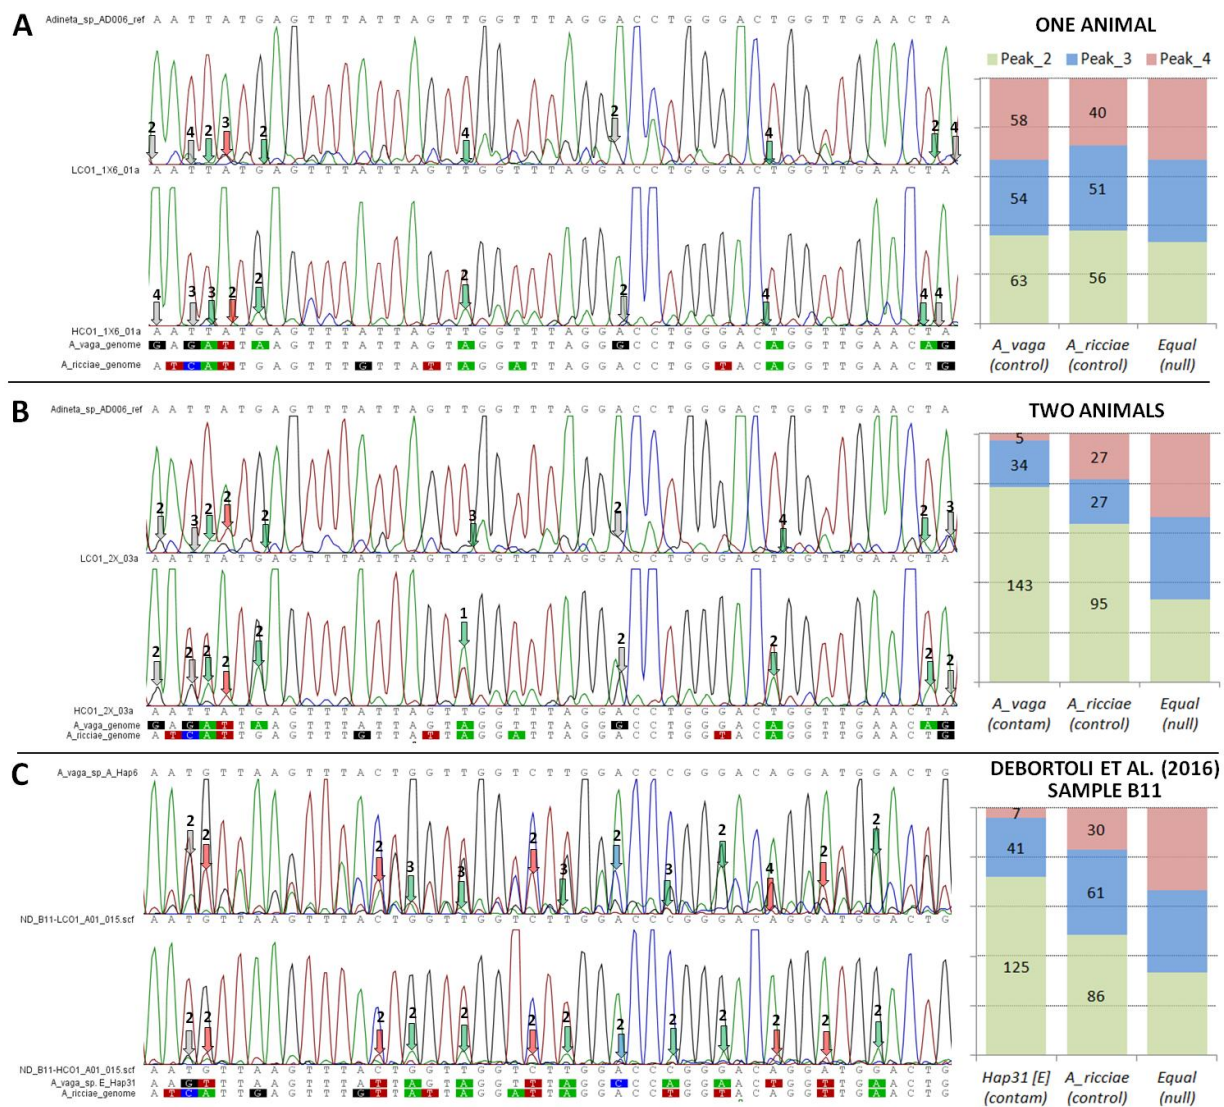

**Figure 1.** Contingency table analysis of minority peak height ranks (ContAMPR), illustrated for mtCO1 chromatograms. **A.** For a sample with a single animal, the height ranks of minority peaks matching other rotifer haplotypes did not differ significantly from an equal distribution ( $\chi^2 = 3.32$ , d.f. = 4,  $P = 0.51$ ). **B.** When two animals were deliberately added to a sample, the minority peaks were a significantly better fit to the known haplotype of the second animal (*Adineta vago*) than either the null expectation ( $\chi^2=88.15$ , d.f. =2,  $P < 2.2 \times 10^{-16}$ ), or a control rotifer haplotype (*A. ricciae*;  $\chi^2=22.54$ , d.f. =2,  $P = 1.27 \times 10^{-5}$ ). **C.** For Sample B11 of Debortoli et al. (2016), minority peaks were a significantly better fit to the predicted haplotype of a suspected second animal (*A. vago* Species E Hap31) than either the null expectation ( $\chi^2=127.95$ , d.f. =2,  $P < 2.2 \times 10^{-16}$ ), or *A. ricciae* ( $\chi^2=25.39$ , d.f. =,  $P = 3.07 \times 10^{-6}$ ). Minority peaks matching the focal query sequence are pointed out for a short illustrative region; numbers indicate peak height ranks. Bar graphs show the total peak height rank distributions for each haplotype across the full length of the aligned sequences (~605bp), and the null expectation if the peaks represent random noise.

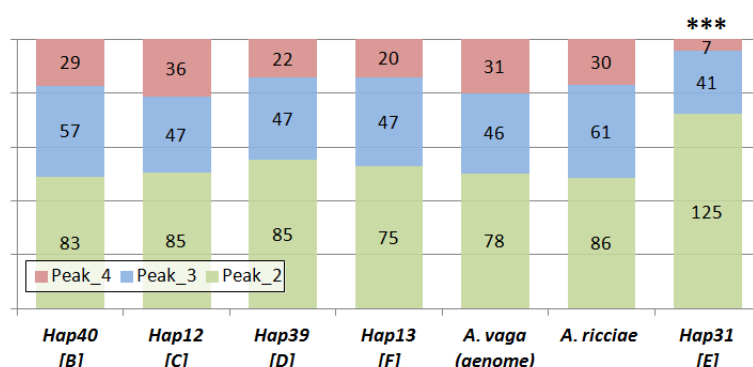

**Figure 2.** The mtCO1 chromatograms of Debortoli et al. (2016) for Sample B11 ("Individual 21" [A]) indicate a second animal belonging to Species E. The minority peaks fit Hap31[E] significantly better than six control haplotypes (\*\*\*:  $\chi^2=39.2$ , d.f. =12,  $P = 9.73 \times 10^{-5}$ ), which represent two reference clones and the other four species reported by Debortoli et al. (2016), and do not have significantly different distributions from each other ( $\chi^2=6.66$ , d.f. = 10,  $P = 0.76$ ).

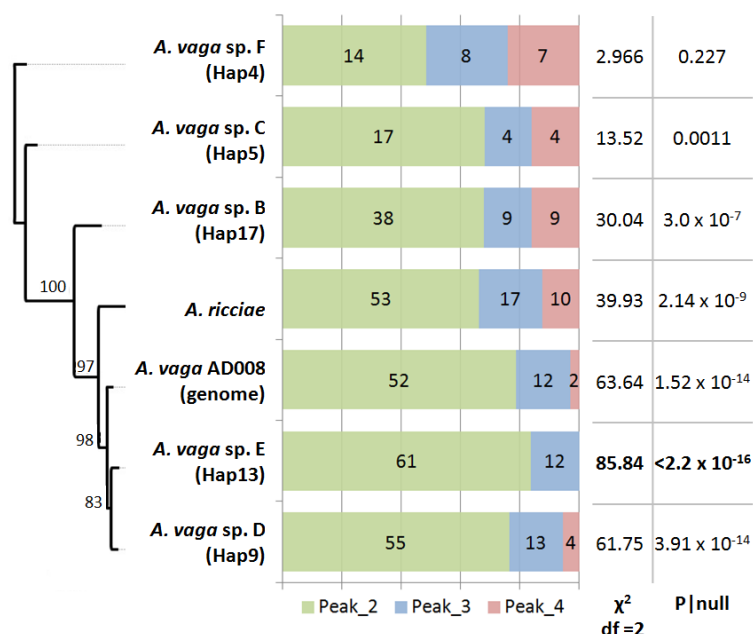

**Figure 3.** Minority peaks in 28S chromatograms for Sample B11 of Debortoli et al. (2016) indicate a second animal belonging to Species E. The probability of obtaining a peak rank distribution this extreme given random noise is lowest for Species E and increases for more distantly related control species, according to a neighbor-joining phylogeny of the 28S marker. When species distributions are compared to each other rather than to the null expectation, Species E fits significantly better than Species F ( $\chi^2=13.61$ , d.f. = 2,  $P = 0.0011$ ), B ( $\chi^2=12.75$ , d.f. = 2,  $P = 0.0017$ ), C ( $\chi^2=12.24$ , d.f. = 2,  $P = 0.0022$ ) or A. ricciae ( $\chi^2=11.13$ , d.f. = 2,  $P = 0.0038$ ). Species D and A. vaga (genome) are very closely related to E, and do not have significantly different distributions.

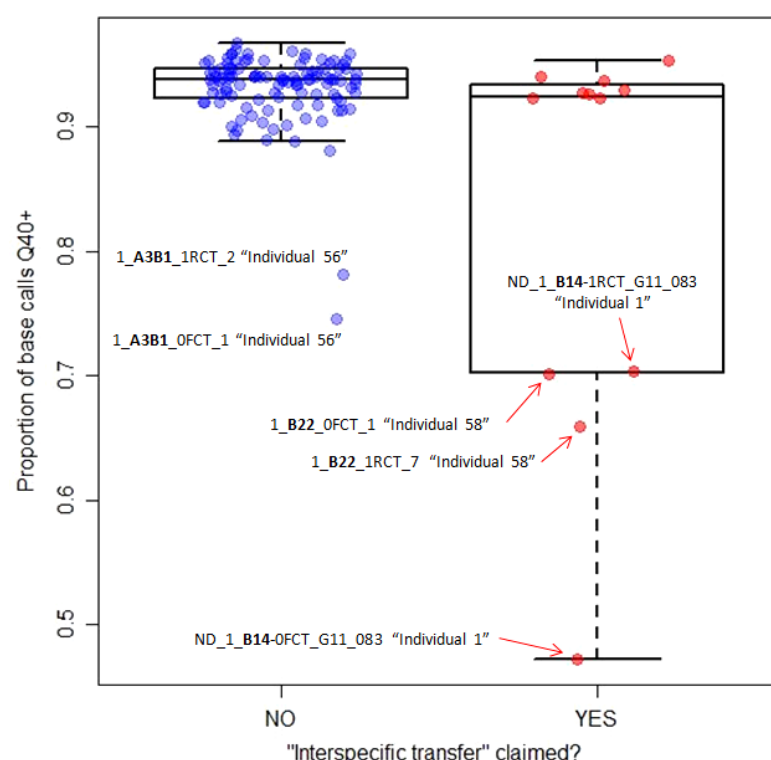

**Figure 4.** For samples where Debortoli et al. (2016) reported "interspecific horizontal genetic transfers", 28S chromatograms have a significantly different distribution of phred quality scores (Mann-Whitney Test:  $N=122$ ,  $W=373.5$ ,  $P=0.015$ ), because multiple 28S haplotypes are more often evident in minority peaks. This evidence is consistent with DNA from multiple animals in these samples, and perhaps also in some samples where "transfer" was not reported (e.g. A3B1). Sample B14 represents an extreme datapoint with an especially prominent second haplotype, but even if this is removed from the analysis, the two groups still differ significantly (Mann-Whitney Test:  $N=121$ ,  $W=373.5$ ,  $P=0.04$ ).

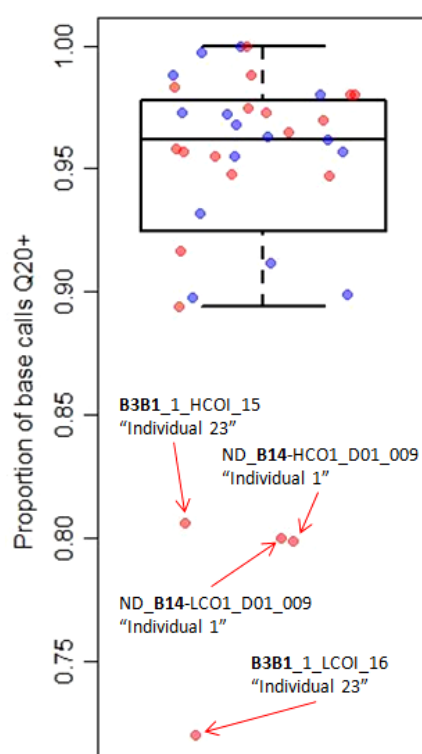

**Figure 5.** Phred quality scores for the subset of mtCO1 chromatograms provided by Debortoli et al. Red points represent samples where interspecific recombination was claimed; blue points represent samples where no such claim was made. The two groups do not have significantly different distributions (Mann-Whitney Test,  $N = 35$ ,  $W = 127.5$ ,  $P = 0.46$ ), which matches the outcome we saw in experimental samples deliberately contaminated with two animals. However, extreme outliers in quality correspond to the only two samples with evidence of nuclear haplotypes from three different species (Table 1). We suggest DNA from three animals was present.

| Sample code | Interpreted as | Haplotypes reported by Debortoli et al. (2016) |                     |                     |                     |           | Additional haplotypes indicated by ConTAMPR | As seen also in | P (fit) given random noise                         |
|-------------|----------------|------------------------------------------------|---------------------|---------------------|---------------------|-----------|---------------------------------------------|-----------------|----------------------------------------------------|
|             |                | mtCO1                                          | 28S                 | EPIC25              | EPIC63              | Nu1054    |                                             |                 | P (fit) versus {control sequences}                 |
| B11         | Ind 21 [A]     | Hap6 [A]                                       | Hap1 [A]            | Hap35 [E]           | Hap16 [E]           | Hap22 [E] | mtCO1 Hap c.f. 31 [E]                       | Ind 81 [E]      | <2.2 x 10 <sup>-16</sup>                           |
|             |                |                                                |                     |                     |                     |           | 28S Hap c.f. 16 [E]                         | Ind 81 [E]      | 9.73 x 10 <sup>-5</sup> {B;C;D;F;Ar;Av}            |
|             |                |                                                |                     |                     |                     |           |                                             |                 | 2.36 x 10 <sup>-15</sup>                           |
| B14*        | Ind 1 [A]      | Hap6 [A]                                       | Hap1 [A]            | Hap9-<br>Hap10 [C]  | Hap16-<br>Hap20 [E] | Missing   | mtCO1 Hap c.f. 10 [C]                       | Ind 50 [C]      | 0.0085 {B&C;F}                                     |
|             |                |                                                |                     |                     |                     |           | 28S Hap c.f. 16 [E]                         | Ind 81 [E]      | 9.1 x 10 <sup>-4</sup>                             |
|             |                |                                                |                     |                     |                     |           | EPIC25 Hap c.f. 30 [E]                      | Ind 81 [E]      | 0.187 {B;D;E;F;Ar;Av} n.s.                         |
|             |                |                                                |                     |                     |                     |           |                                             |                 | <2.2 x 10 <sup>-16</sup>                           |
| B22         | Ind 58 [C]     | Hap10 [C]                                      | Hap5-<br>Hap6 [C]   | Hap37 [E]           | Missing             | Hap16 [C] | mtCO1 Hap c.f. 36 [E]                       | Ind 80 [E]      | 3.99 x 10 <sup>-10</sup> {A;B;D;F;Ar;Av}           |
|             |                |                                                |                     |                     |                     |           | 28S Hap c.f. 16 [E]                         | Ind 72 [E]      | 3.69 x 10 <sup>-10</sup>                           |
|             |                |                                                |                     |                     |                     |           | EPIC25 Hap c.f. 37 [E]                      | Ind 72 [E]      | 0.029 {A&B&F}                                      |
| B3B1*       | Ind 23 [A]     | Hap1 [A]                                       | Hap1-<br>Hap2 [A]   | Hap35 [E]           | Hap1 [A]            | Missing   | mtCO1 Hap c.f. 11 [C]                       | Ind 33 [C]      | NA (>7 self-evident polymorphisms)                 |
|             |                |                                                |                     |                     |                     |           | EPIC25 Hap c.f. 10 [C] (& Hap c.f. 6 [C]?)  | Ind 47 [C]      | 0.00158                                            |
|             |                |                                                |                     |                     |                     |           |                                             |                 | 0.99 {B;C;D;E;F;Ar;Av} n.s.                        |
| B39         | Ind 66 [E]     | Hap10 [C]                                      | Hap11-<br>Hap16 [E] | Hap30-<br>Hap36 [E] | Hap16 [E]           | Hap19 [E] | mtCO1 Hap c.f. 31 [E]                       | Ind 81 [E]      | <2.2 x 10 <sup>-16</sup>                           |
|             |                |                                                |                     |                     |                     |           |                                             |                 | <2.2 x 10 <sup>-16</sup> {A;B;D;F;Ar;Av}           |
|             |                |                                                |                     |                     |                     |           |                                             |                 | 2.2 x 10 <sup>-11</sup> {Hap29;32;33;34;35;36 [E]} |
| D14         | Ind 5 [A]      | Hap3 [A]                                       | Hap1 [A]            | Hap10 [C]           | Hap1 [A]            | Hap1 [A]  | EPIC25 Hap4 [A]                             | Ind 6 [A]       | 0.0095 {Hap29 [E]; Hap34 [E]}                      |
|             |                |                                                |                     |                     |                     |           |                                             |                 | <2.2 x 10 <sup>-16</sup>                           |
|             |                |                                                |                     |                     |                     |           |                                             |                 | NA (no other haplotype would align)                |

**Table 1.** Debortoli et al. (2016) reported six samples with incongruent species assignments among marker loci, which were interpreted as *Adineta* individuals that had acquired DNA horizontally from a "donor species". For all six samples, minority peaks in chromatograms provided by the authors revealed additional haplotypes closely comparable to those seen in other animals in their dataset. These either matched the putative donor species, or the 'native' sequence that was supposed to have been replaced, as expected if incongruence was caused by cross-contamination. The height rank distributions of minority peaks corresponding to additional haplotypes were recorded, and we calculated the probability of obtaining a fit at least this good given random noise (final column, upper values). Where possible, we also recorded the equivalent fit for control species or haplotypes, and calculated the probability that the fit of the focal haplotype shared the same distribution (final column, lower values). "Ar": *A. ricciae*; "Av": *A. vaga* (reference genome). Asterisks indicate two samples where haplotypes from three different species were recovered.



| Sample                | Interpreted as | Marker | Claimed replacement of haplotypes via HR | GC content difference (%) | Pairwise identity (%) |
|-----------------------|----------------|--------|------------------------------------------|---------------------------|-----------------------|
| <b>B11</b>            | Ind 21 [A]     | Nu1054 | Hap22 [E] rpl. Hap2 [A]                  | -21.2                     | <b>71.0</b>           |
|                       |                | EPIC25 | Hap35 [E] rpl. Hap1 [A]                  | -17.7                     | <b>72.3</b>           |
|                       |                | EPIC63 | Hap16 [E] rpl. Hap1 [A]                  | -13.6                     | <b>70.8</b>           |
| <b>B14</b>            | Ind 1 [A]      | EPIC25 | Hap9&10 [C] rpl. Hap1 [A]                | +4.9                      | <b>80.2</b>           |
|                       |                | EPIC63 | Hap16&20 [E] rpl. Hap1 [A]               | -13.6                     | <b>70.4</b>           |
| <b>B22</b>            | Ind 58 [C]     | EPIC25 | Hap37 [E] rpl. Hap10 [C]                 | -21.8                     | <b>68.4</b>           |
| <b>B39</b>            | Ind 66 [E]     | mtCO1  | Hap10 [C] rpl. Hap31[E]                  | -0.2                      | <b>88.4</b>           |
| <b>B3B1</b>           | Ind 23 [A]     | EPIC25 | Hap35 [E] rpl. Hap1 [A]                  | -17.7                     | <b>72.3</b>           |
| <b>D14</b>            | Ind 5 [A]      | EPIC25 | Hap10 [C] rpl. Hap4 [A]                  | +4.7                      | <b>79.8</b>           |
| <b>Mean (median):</b> |                |        |                                          | <b>-10.7 (-13.6)</b>      | <b>74.8 (72.3)</b>    |

**Table 2.** Pairwise identity between sequences that have undergone extremely recent "interspecific genetic exchange" according to Debortoli et al. (2016). This degree of sequence divergence is not compatible with current understanding of homologous recombination, or with the tetraploid structure of the *A. vaga* genome. However, it is consistent with the alternative hypothesis of cross-contamination. Large divergences correspond to substantial GC content differences among species.
